# Supplementary material for: Effects of AKT inhibitor therapy in response and resistance to BRAF inhibition in melanoma
Source: PubMed Central journal article supplement (PMC4021505; doi:10.1186/1476-4598-13-83), 2014-04-16
Supplement: 1476-4598-13-83-S1.pdf [file 1476-4598-13-83-S1.pdf]

Figure S1  
1/4

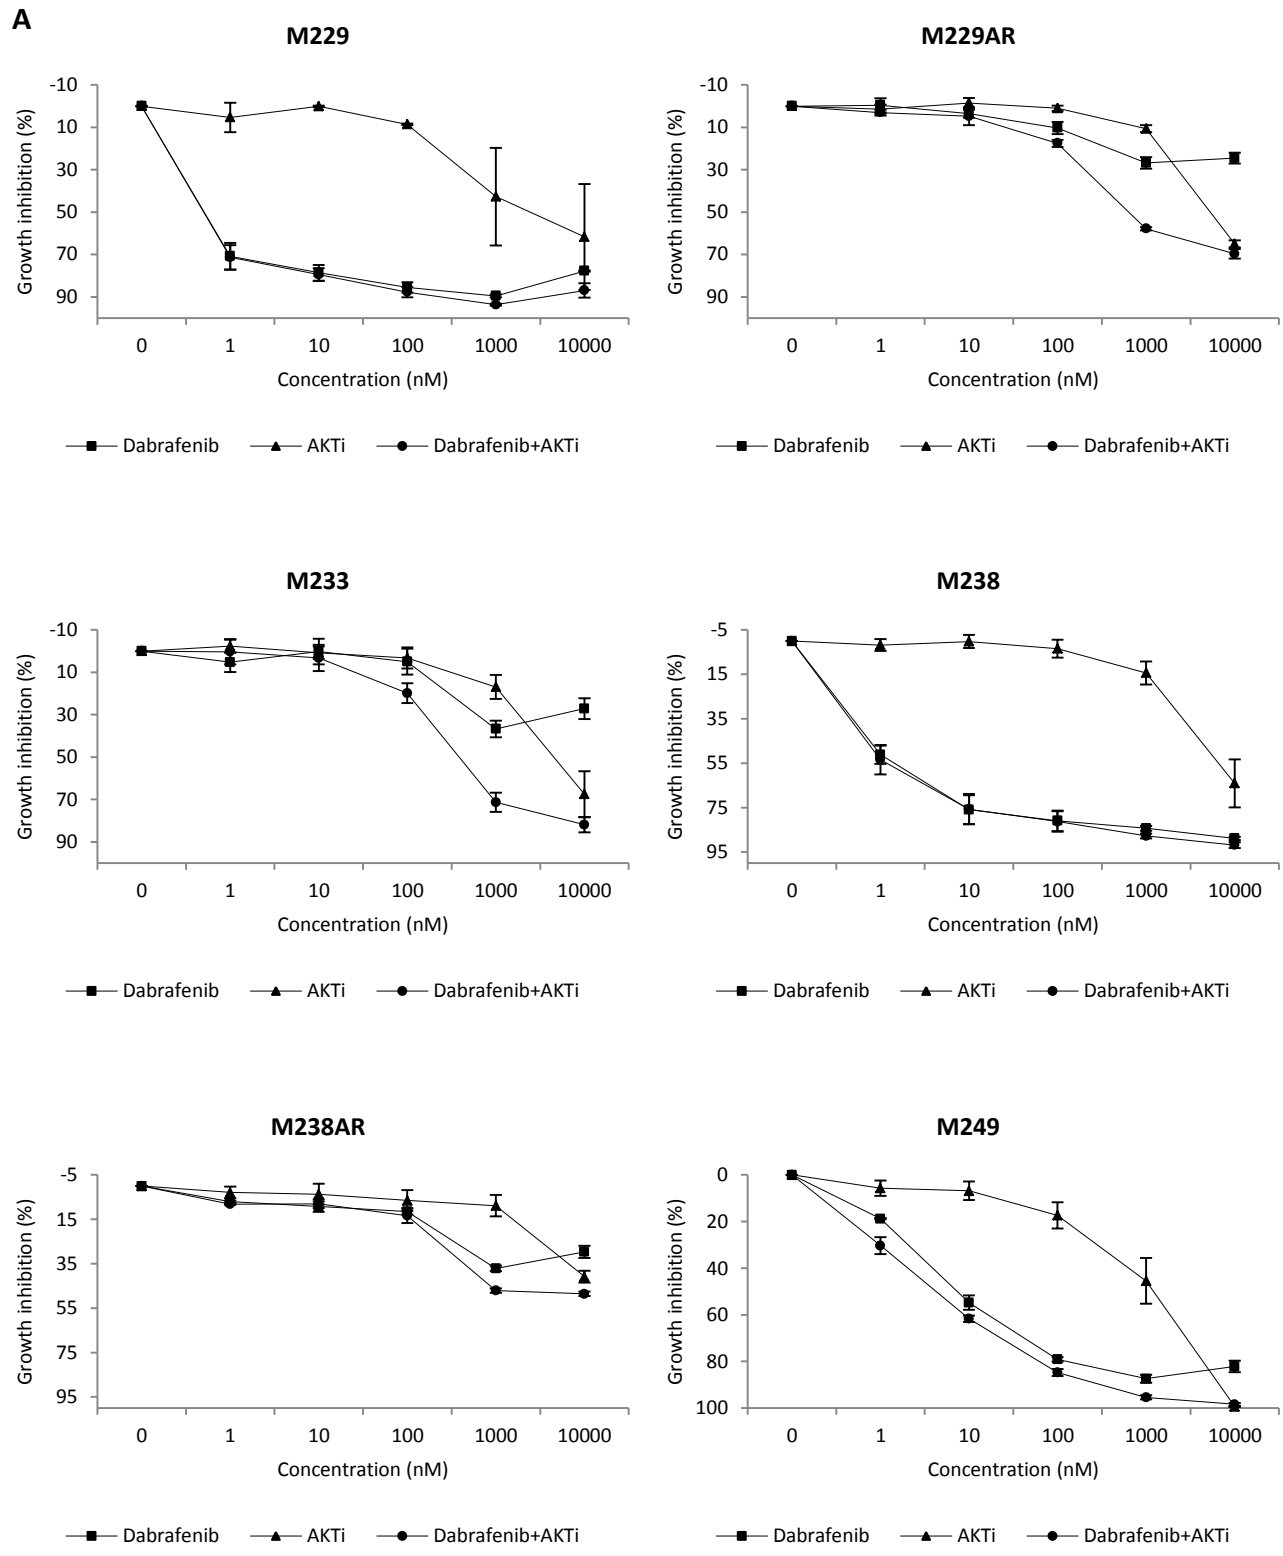

Figure S1  
2/4

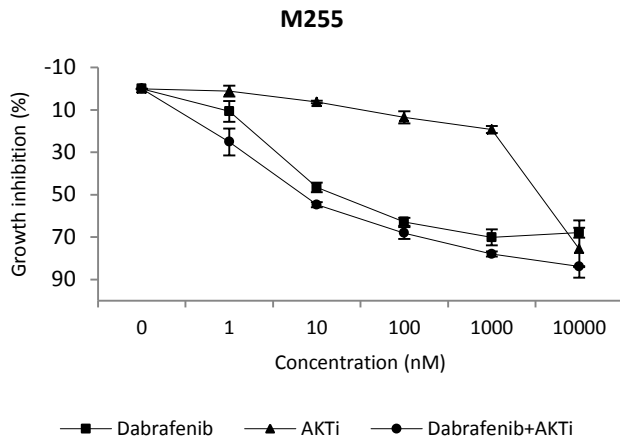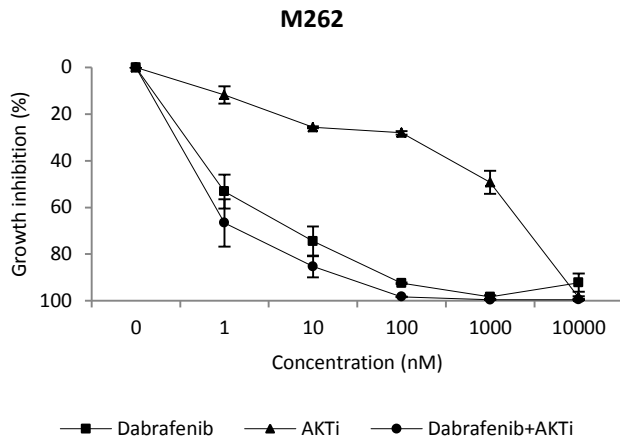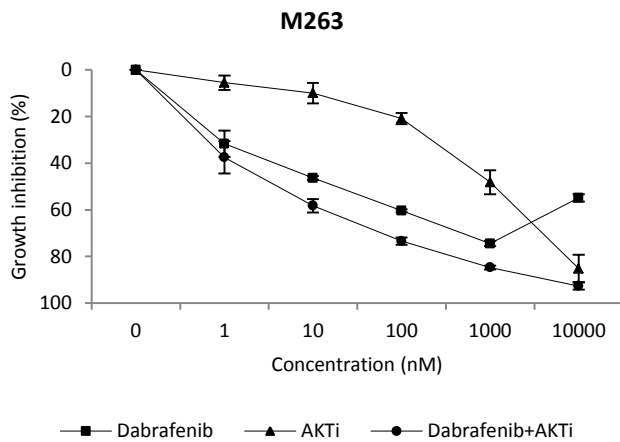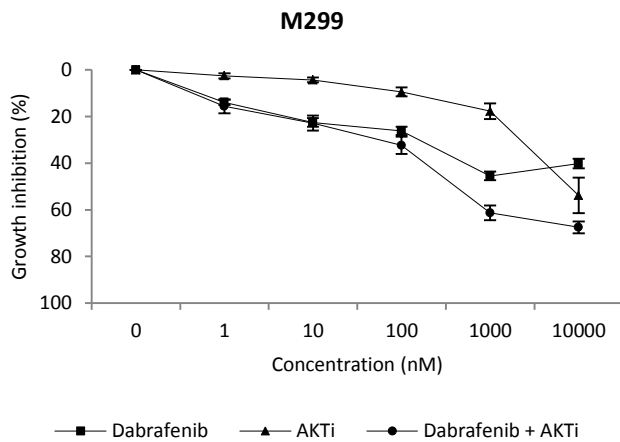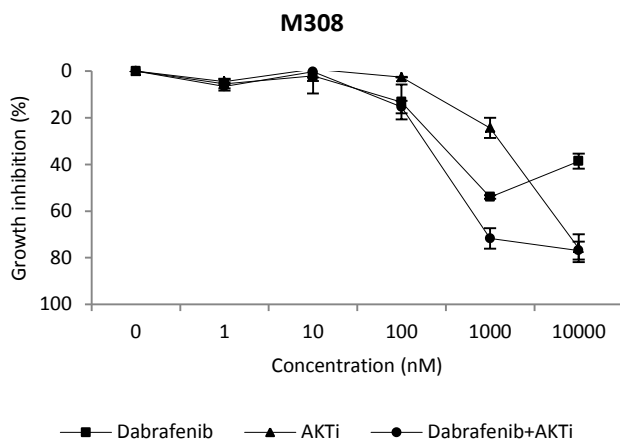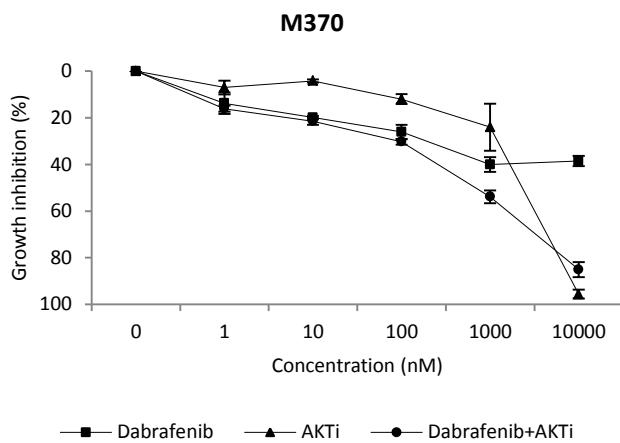

Figure S1  
3/4

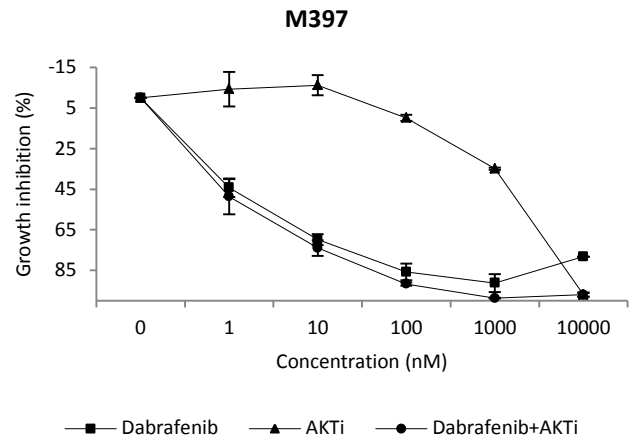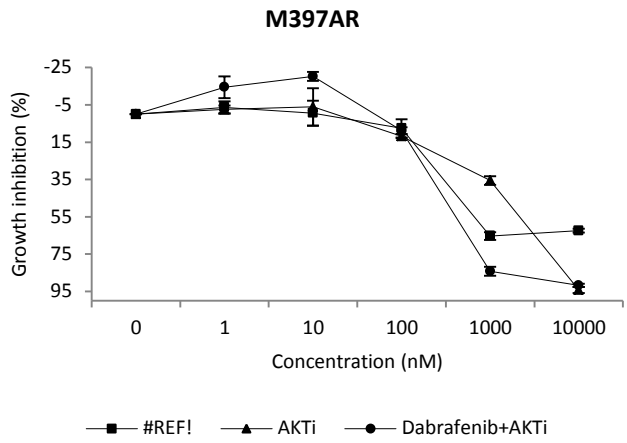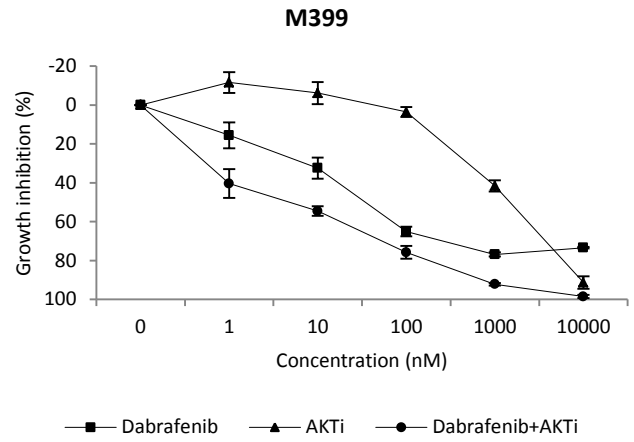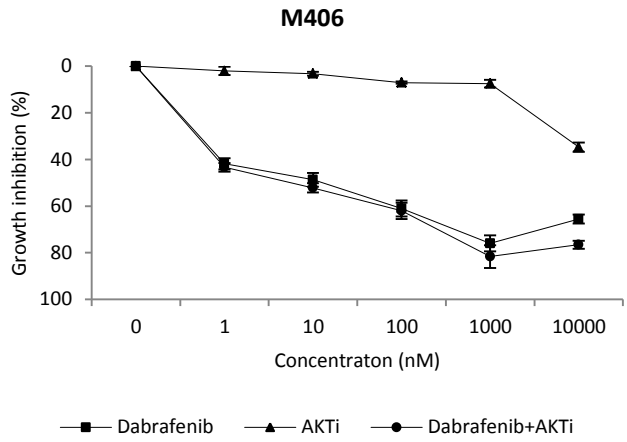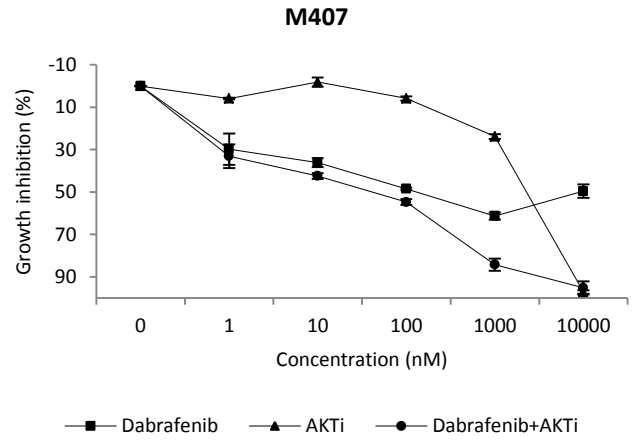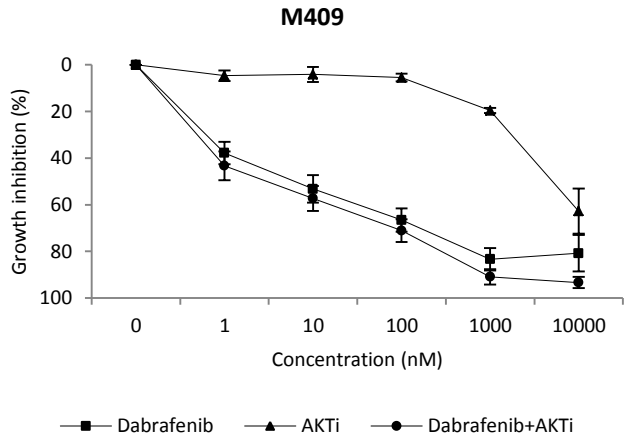

Figure S1  
4/4

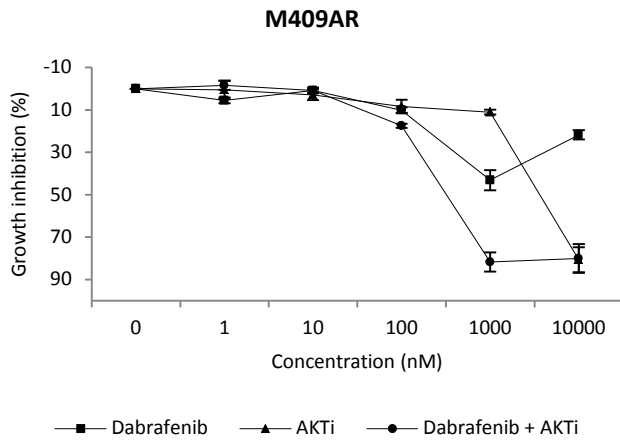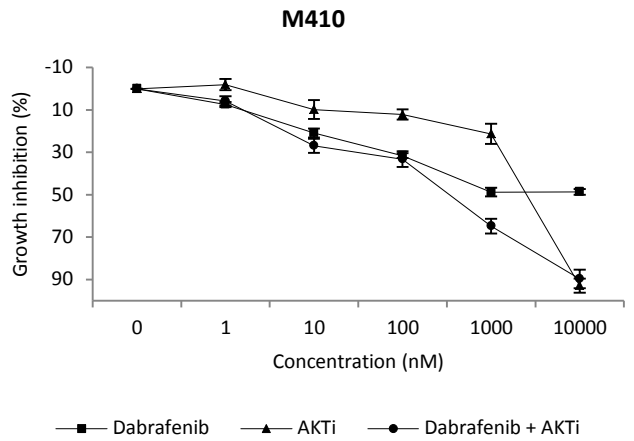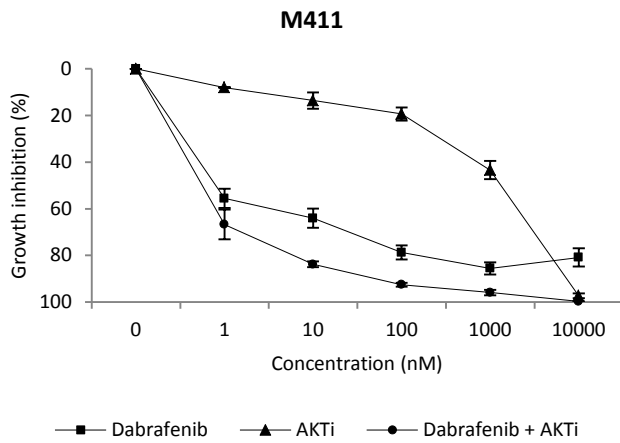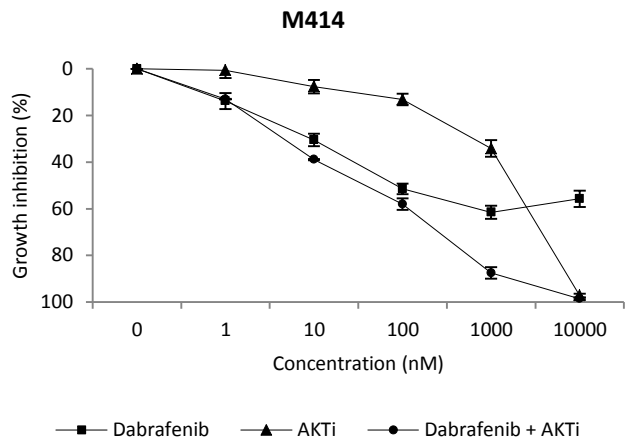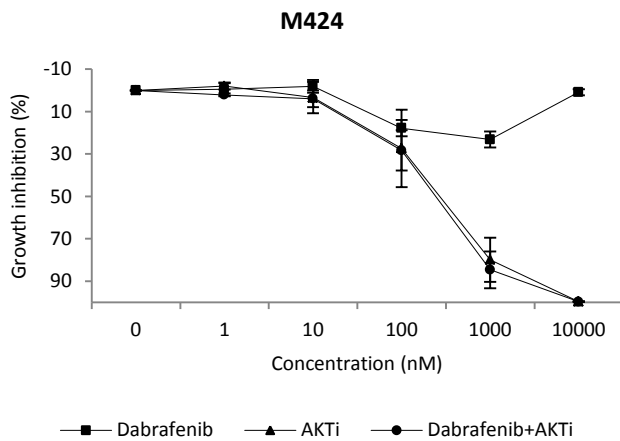

**B**

| Cell line | Dabrafenib |      | AKTi |      | Dabrafenib + AKTi |      |
|-----------|------------|------|------|------|-------------------|------|
|           | m          | r    | m    | r    | m                 | r    |
| M249      | 0,36       | 0,89 | 0,70 | 0,84 | 0,61              | 0,99 |
| M399      | 0,33       | 0,92 | 1,36 | 0,94 | 0,70              | 0,98 |
| M263      | 0,14       | 0,72 | 0,68 | 0,97 | 0,33              | 0,99 |
| M229AR    | 0,92       | 0,89 | 0,60 | 0,59 | 0,73              | 0,85 |
| M397AR    | 0,80       | 0,72 | 1,39 | 0,93 | 1,11              | 0,97 |
| M238AR    | 0,23       | 0,89 | 0,55 | 0,83 | 0,31              | 0,91 |
| M370      | 0,18       | 0,89 | 0,56 | 0,84 | 0,35              | 0,96 |
| M233      | 0,45       | 0,93 | 0,75 | 0,91 | 0,88              | 0,96 |
| M410      | 0,86       | 0,85 | 1,23 | 0,92 | 0,83              | 0,95 |
| M308      | 0,47       | 0,76 | 0,60 | 0,77 | 0,65              | 0,79 |
| M409AR    | 0,47       | 0,81 | 0,86 | 0,92 | 1,07              | 0,94 |
| M255      | 0,35       | 0,86 | 1,01 | 0,92 | 0,43              | 0,99 |
| M414      | 0,28       | 0,88 | 1,01 | 0,91 | 0,69              | 0,99 |
| M299      | 0,17       | 0,94 | 0,41 | 0,94 | 0,29              | 0,96 |
| M407      | 0,36       | 0,82 | 1,14 | 0,83 | 0,59              | 0,96 |
