# Supplementary material for: Effects of AKT inhibitor therapy in response and resistance to BRAF inhibition in melanoma
Source: PubMed Central journal article supplement (PMC4021505; doi:10.1186/1476-4598-13-83), 2014-04-16

Figure S3

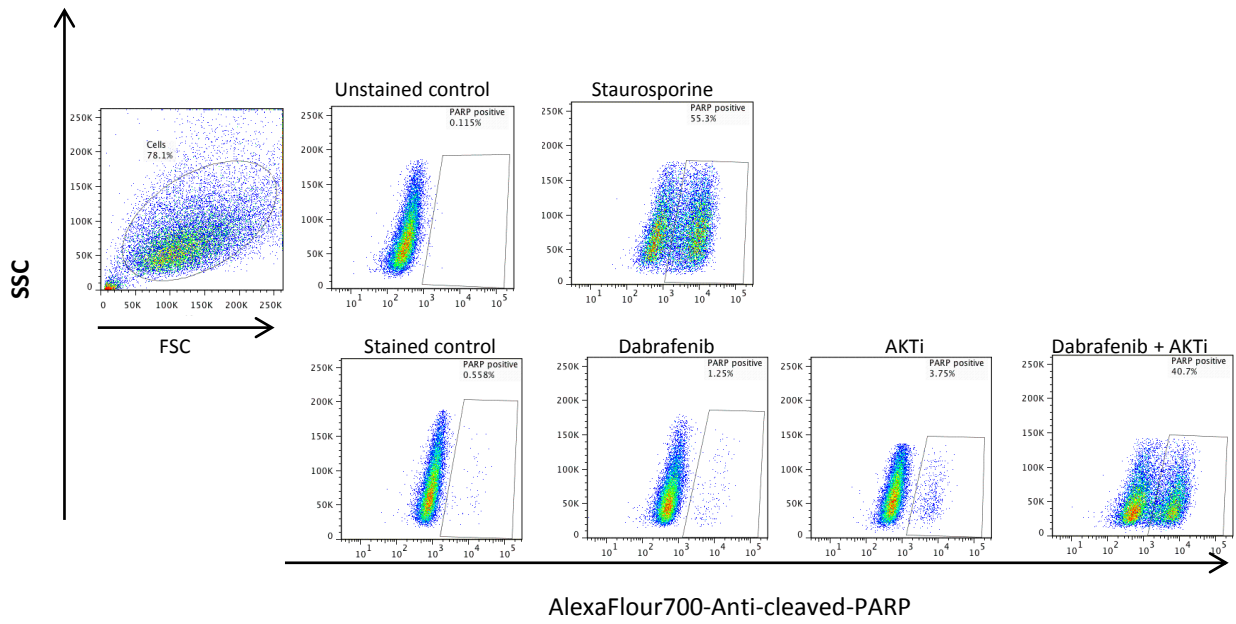

Supplement: 1476-4598-13-83-S3.pdf [file 1476-4598-13-83-S3.pdf]
